# Supplementary material for: Integrative analysis of the transcriptome and metabolome provides insights into polysaccharide accumulation in Polygonatum odoratum (Mill.) Druce rhizome
Source: PeerJ. 2024 Jul 9;12:e17699. doi: 10.7717/peerj.17699 (PMC11243984; doi:10.7717/peerj.17699)
Supplement: Supplemental Information 2 [file peerj-12-17699-s002.xls]

## Sheet: raw data for Figure 9
Cq
Sample	Actin	TRINITY_DN21530_c0_g1_i1_1	TRINITY_DN29047_c1_g1_i18_3	TRINITY_DN31666_c1_g1_i9_3	TRINITY_DN34969_c0_g1_i3_2	TRINITY_DN29714_c0_g1_i1_3	TRINITY_DN24830_c0_g1_i4_1	TRINITY_DN33146_c0_g1_i3_3	TRINITY_DN33229_c0_g1_i4_3	TRINITY_DN33229_c0_g2_i1_3
Y10-1	20.508	24.9006	25.563	24.9723	24.3968	23.562	26.6975	24.4311	25.9973	26.8508
Y10-1	20.3679	25.1282	24.5103	24.779	24.559	23.3407	26.9614	24.4046	26.0485	26.6452
Y10-1	20.2426	24.8516	24.7602	24.5903	24.6186
Y10-2	21.0765	23.9632	25.2426	25.0919	25.1151	23.3546	27.6361	24.3904	26.5494	26.2366
Y10-2	21.0049	23.5814	25.2708	25.1399	25.0758	23.3858	27.8075	24.3183	26.0194	26.2154
Y10-2	20.7294	23.9165	25.6672	25.1743	25.4083
Y10-3	23.4016	26.3148	28.743	28.0472	28.1389	25.2972	30.0098	26.6153	29.391	28.2055
Y10-3	23.2508	26.6424	28.9202	28.0486	28.0038	25.2176	29.6411	26.0948	28.9566	28.4709
Y10-3	23.2958	26.1439	28.2304	27.7682	28.5664
Y11-1	22.078	26.1482	26.2761	26.802	25.6559	27.4747	28.7396	25.0902	26.9181	26.1021
Y11-1	22.0344	25.7462	26.2742	27.1278	25.5237	27.8858	28.4436	24.962	27.1347	26.3966
Y11-1	22.23	25.7964	26.1366	27.2895	25.4915
Y11-2	21.9073	25.4179	26.1855	25.3351	25.3159	25.704	27.6966	22.9723	26.2453	26.4079
Y11-2	21.5155	25.107	25.94	25.7645	25.4164	25.4504	27.6893	23.7673	26.9599	25.9388
Y11-2	21.6007	25.1154	25.6632	25.4339	25.5011
Y11-3	22.1525	25.8007	26.5841	25.8085	25.3509	25.6672	28.3907	23.8709	27.0127	27.3138
Y11-3	22.2627	26.0079	26.2202	25.71	25.83	26.2266	28.1925	24.0471	27.9863	27.6703
Y11-3	22.3091	25.8541	26.4291	25.8631	25.5931

## Sheet: raw data for Figure6
samples	actin (Cq)	UGDH (Cq)	HK (Cq)	UGP2 (Cq)	SUS (Cq)
Root 1	22.0345	26.1755	24.3501	25.1627	23.5428
Root 1	22.0606	26.3299	24.305	25.4558	23.2025
Root 1	22.2028	25.7612	23.7952	25.2897	23.4331
Rhizome 1	23.9454	27.5392	23.6128	26.4778	26.0138
Rhizome 1	24.502	27.862	23.9219	26.5351	25.7716
Rhizome 1	23.6499	28.4197	23.9038	26.7806	26.5559
Leaf 1	22.406	24.4622	23.3434	24.5217	23.3749
Leaf 1	22.4254	24.0129	23.5019	24.8431	23.6791
Leaf 1	22.7576	23.7687	23.4487	25.2203	23.9108
Flower 1	21.9818	24.6451	23.2398	26.4185	23.5855
Flower 1	22.0224	24.8697	23.5549	26.38	23.9017
Flower 1	22.2597	24.7141	22.9247	25.8569	23.8993
Stem 1	22.0489	24.0633	23.5449	25.108	24.5503
Stem 1	23.5844	24.4183	24.1439	25.5212	23.9778
Stem 1	22.275	24.5141	23.5159	24.8798	24.4928
Root 2	22.8403	26.5129	25.1243	26.4741	23.6104
Root 2	22.9216	26.3194	25.5837	26.108	24.0079
Root 2	22.5759	26.9973	24.2469	25.8252	24.0292
Rhizome 2	22.2508	26.0698	22.2615	24.8529	24.0461
Rhizome 2	22.0229	26.0439	22.3881	24.3287	23.8794
Rhizome 2	21.7905	25.1392	22.8828	24.3905	23.3562
Leaf 2	22.0403	23.0107	22.8305	24.3468	22.9082
Leaf 2	21.3038	22.8231	22.4794	24.0483	22.922
Leaf 2	21.6234	23.2832	22.5743	23.5127	22.5855
Flower 2	21.9686	24.345	23.0745	26.5491	23.7788
Flower 2	22.0412	24.9779	23.4346	25.8484	23.5944
Flower 2	21.6392	24.3714	23.5408	26.1278	23.7169
Stem 2	22.0936	23.058	23.2856	24.8867	23.4178
Stem 2	21.8709	23.3029	23.4712	24.4878	23.575
Stem 2	21.6773	24.0276	23.4084	24.9227	22.6742
Root 3	21.251	24.7994	22.3689	24.4909	21.3104
Root 3	21.2098	25.1176	23.1733	24.0122	22.0079
Root 3	20.1548	24.6425	23.0228	23.8252	22.4294
Rhizome 3	20.2865	24.3374	20.612	22.625	21.0461
Rhizome 3	19.937	24.2058	20.2783	23.1766	21.0794
Rhizome 3	20.0167	24.2588	20.37	22.5215	21.7972
Leaf 3	20.8423	22.1301	21.2661	23.1221	21.9082
Leaf 3	20.2303	21.7233	21.6624	22.2788	21.922
Leaf 3	20.9374	22.1808	21.1108	22.6855	21.9499
Flower 3	20.9564	23.4884	21.6096	24.7493	22.3788
Flower 3	20.767	23.5413	22.576	25.1565	21.7944
Flower 3	20.7898	23.0501	22.2042	24.8055	23.1708
Stem 3	22.369	24.0455	23.0661	24.5884	23.4178
Stem 3	22.3133	23.5603	23.8871	25.2781	23.875
Stem 3	22.1419	24.2524	23.1617	25.0889	24.0182
